# Supplementary material for: Optimal tuning of weighted kNN- and diffusion-based methods for denoising single cell genomics data
Source: PubMed Central journal article supplement (PMC7817019; doi:10.1371/journal.pcbi.1008569), 2021-01-07
Supplement: pcbi.1008569.s003.pdf [file pcbi.1008569.s003.pdf]

|                | gene         | dal80      | dal81 | dal82 | gat1       | gcn4       | gln3  | gzf3   | rtg1  | rtg3  | stp1   | stp2  |
|----------------|--------------|------------|-------|-------|------------|------------|-------|--------|-------|-------|--------|-------|
| metric         | method       |            |       |       |            |            |       |        |       |       |        |       |
| aupr           | DEWAKSS      | 0.000      | 0.262 | 0.000 | 0.000      | 2.913e-02  | 0.408 | 0.000  | 0.162 | 0.163 | 0.525  | 0.000 |
|                | DeepImpute   | 0.000      | 0.231 | 0.326 | 1.706e-04  | 1.192e-02  | 0.325 | 0.077  | 0.116 | 0.181 | 0.501  | 0.050 |
|                | DrImpute     | 0.000      | 0.217 | 0.135 | 5.482e-04  | 1.243e-02  | 0.289 | 0.039  | 0.161 | 0.136 | 0.500  | 0.040 |
|                | MAGIC        | 0.000      | 0.000 | 0.000 | 0.000      | 1.965e-02  | 0.325 | 0.000  | 0.046 | 0.084 | 0.504  | 0.000 |
|                | SAVER        | 1.706e-04  | 0.270 | 0.251 | 0.000      | 3.342e-02  | 0.374 | 0.056  | 0.212 | 0.213 | 0.544  | 0.152 |
|                | preprocessed | 0.000      | 0.264 | 0.326 | 1.706e-04  | 2.291e-02  | 0.352 | 0.144  | 0.190 | 0.197 | 0.528  | 0.349 |
| auroc          | DEWAKSS      | 5.000e-01  | 0.579 | 0.500 | 5.000e-01  | 5.233e-01  | 0.614 | 0.500  | 0.702 | 0.618 | 0.533  | 0.500 |
|                | DeepImpute   | 5.000e-01  | 0.525 | 0.550 | 4.999e-01  | 5.110e-01  | 0.538 | 0.510  | 0.646 | 0.574 | 0.506  | 0.543 |
|                | DrImpute     | 5.000e-01  | 0.526 | 0.606 | 8.444e-01  | 4.979e-01  | 0.525 | 0.552  | 0.770 | 0.618 | 0.499  | 0.522 |
|                | MAGIC        | 5.000e-01  | 0.500 | 0.500 | 5.000e-01  | 5.432e-01  | 0.534 | 0.500  | 0.525 | 0.561 | 0.511  | 0.500 |
|                | SAVER        | 4.597e-01  | 0.585 | 0.550 | 5.000e-01  | 5.810e-01  | 0.588 | 0.531  | 0.691 | 0.646 | 0.560  | 0.653 |
|                | preprocessed | 5.000e-01  | 0.519 | 0.550 | 5.001e-01  | 5.070e-01  | 0.528 | 0.521  | 0.650 | 0.571 | 0.508  | 0.506 |
| avg_pr         | DEWAKSS      | 0.000      | 0.262 | 0.000 | 0.000      | 2.969e-02  | 0.409 | 0.000  | 0.166 | 0.164 | 0.525  | 0.000 |
|                | DeepImpute   | 0.000      | 0.198 | 0.102 | 3.411e-04  | 9.468e-03  | 0.297 | 0.015  | 0.105 | 0.118 | 0.493  | 0.041 |
|                | DrImpute     | 0.000      | 0.218 | 0.102 | 1.096e-03  | 1.593e-02  | 0.290 | 0.041  | 0.163 | 0.137 | 0.501  | 0.041 |
|                | MAGIC        | 0.000      | 0.000 | 0.000 | 0.000      | 1.069e-02  | 0.326 | 0.000  | 0.046 | 0.083 | 0.504  | 0.000 |
|                | SAVER        | 3.411e-04  | 0.267 | 0.102 | 0.000      | 3.306e-02  | 0.372 | 0.056  | 0.216 | 0.204 | 0.540  | 0.153 |
|                | preprocessed | 0.000      | 0.195 | 0.102 | 3.412e-04  | 1.516e-02  | 0.296 | 0.044  | 0.150 | 0.123 | 0.501  | 0.036 |
| jaccard        | DEWAKSS      | 0.000      | 0.135 | 0.000 | 0.000      | 8.091e-03  | 0.282 | 0.000  | 0.032 | 0.079 | 0.350  | 0.000 |
|                | DeepImpute   | 0.000      | 0.017 | 0.100 | 0.000      | 0.000      | 0.108 | 0.000  | 0.093 | 0.062 | 0.111  | 0.006 |
|                | DrImpute     | 0.000      | 0.113 | 0.100 | 0.000      | 7.759e-03  | 0.281 | 0.021  | 0.023 | 0.065 | 0.428  | 0.012 |
|                | MAGIC        | 0.000      | 0.000 | 0.000 | 0.000      | 9.773e-03  | 0.194 | 0.000  | 0.017 | 0.061 | 0.337  | 0.000 |
|                | SAVER        | 0.000      | 0.114 | 0.100 | 0.000      | 2.066e-02  | 0.238 | 0.036  | 0.056 | 0.125 | 0.324  | 0.117 |
|                | preprocessed | 0.000      | 0.016 | 0.100 | 0.000      | 1.667e-02  | 0.036 | 0.043  | 0.139 | 0.064 | 0.025  | 0.006 |
| mcc            | DEWAKSS      | 0.000      | 0.113 | 0.000 | 0.000      | -9.286e-04 | 0.111 | 0.000  | 0.085 | 0.088 | 0.052  | 0.000 |
|                | DeepImpute   | 0.000      | 0.065 | 0.316 | -2.413e-04 | -5.300e-03 | 0.034 | -0.001 | 0.157 | 0.137 | -0.003 | 0.052 |
|                | DrImpute     | 0.000      | 0.034 | 0.316 | -2.413e-04 | -4.996e-03 | 0.043 | 0.103  | 0.074 | 0.061 | -0.012 | 0.073 |
|                | MAGIC        | 0.000      | 0.000 | 0.000 | 0.000      | 9.125e-03  | 0.052 | 0.000  | 0.009 | 0.035 | 0.012  | 0.000 |
|                | SAVER        | -2.413e-04 | 0.130 | 0.316 | 0.000      | 3.271e-02  | 0.108 | 0.085  | 0.136 | 0.170 | 0.067  | 0.241 |
|                | preprocessed | 0.000      | 0.058 | 0.316 | -2.413e-04 | 4.529e-02  | 0.033 | 0.169  | 0.237 | 0.141 | 0.022  | 0.052 |
| predicted DEGs | DEWAKSS      | 0          | 703   | 0     | 0          | 570        | 3605  | 0      | 1749  | 1847  | 2870   | 0     |
|                | DeepImpute   | 0          | 37    | 1     | 1          | 18         | 715   | 1      | 104   | 65    | 738    | 2     |
|                | DrImpute     | 0          | 1024  | 1     | 1          | 1116       | 5322  | 2      | 3755  | 3831  | 4525   | 4     |
|                | MAGIC        | 0          | 0     | 0     | 0          | 3150       | 1738  | 0      | 3321  | 3719  | 2933   | 0     |
|                | SAVER        | 1          | 417   | 1     | 0          | 194        | 2040  | 11     | 787   | 654   | 2453   | 49    |
|                | preprocessed | 0          | 38    | 1     | 1          | 8          | 175   | 3      | 69    | 67    | 132    | 2     |
| GS DEGs        | bulk data    | 2          | 1032  | 10    | 2          | 53         | 1647  | 46     | 95    | 330   | 2908   | 170   |

S2 Table: All metrics computed for benchmarking differentially expressed genes (DEGs), Section 2.6. The Gold Standard (GS) is knockout strains collected from the bulk deleteome data[22].
