# Supplementary material for: Optimal tuning of weighted kNN- and diffusion-based methods for denoising single cell genomics data
Source: PubMed Central journal article supplement (PMC7817019; doi:10.1371/journal.pcbi.1008569), 2021-01-07
Supplement: pcbi.1008569.s012.pdf [file pcbi.1008569.s012.pdf]

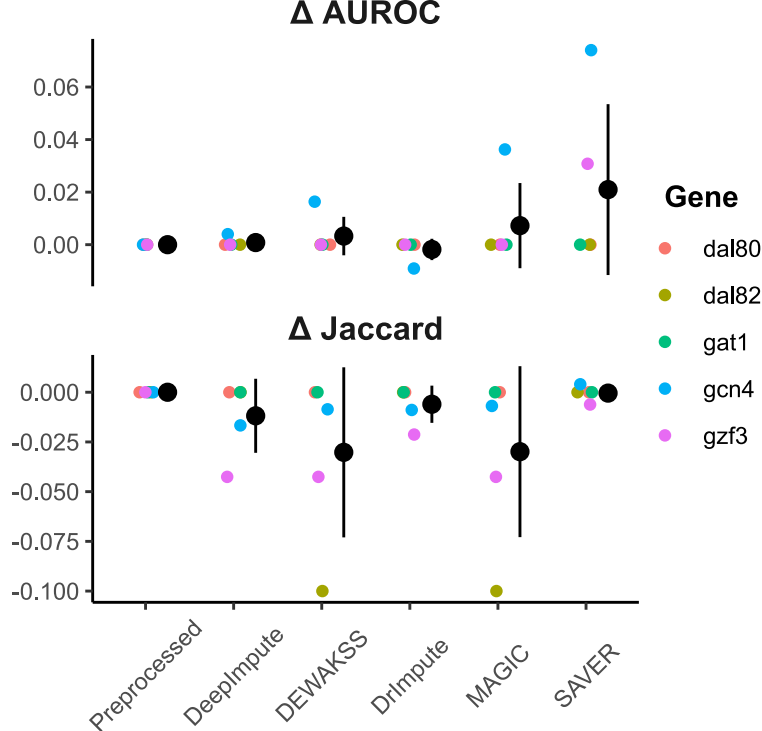

S9 Fig: Differentially expressed genes (DEGs) between bulk and single cell data for deletion strains with few DEGs ( $< 63$ , 1% of yeast genome). Top panel is delta AUROC between bulk DEGs and single cell DEGs ordered by adjusted p-value. Bottom panel is delta Jaccard index for single-cell DEGs at FDR = 0.01 for each separate deletion strain. *preprocessed* is count normalized and log-transformed with no denoising method. Delta is taken between denoised and preprocessed.
